# Supplementary material
Source: PubMed Central journal article supplement (PMC5223099)
Supplement: NIHMS840407-supplement-Supplemental.pdf [file NIHMS840407-supplement-Supplemental.pdf]

Supporting Information for

# Photoacoustic and Colorimetric Visualization of Latent Fingerprints

*Kai Song<sup>1,3§</sup>, Peng Huang<sup>2,5§,\*</sup>, Chenglin Yi<sup>3</sup>, Bo Ning<sup>4</sup>, Song Hu<sup>4</sup>, Liming Nie<sup>5</sup>, Xiaoyuan  
Chen<sup>5,\*</sup>, Zhihong Nie<sup>3,\*</sup>*

<sup>1</sup>School of Life Science, Changchun Normal University, Changchun 130031, China

<sup>2</sup>Guangdong Key Laboratory for Biomedical Measurements and Ultrasound Imaging,  
Department of Biomedical Engineering, School of Medicine, Shenzhen University, Shenzhen  
518060, China

<sup>3</sup>Department of Chemistry and Biochemistry, University of Maryland, College Park, Maryland  
20742 United States

<sup>4</sup>Department of Biomedical Engineering, University of Virginia, Charlottesville, VA 22903

<sup>5</sup>Laboratory of Molecular Imaging and Nanomedicine (LOMIN), National Institute of  
Biomedical Imaging and Bioengineering (NIBIB), National Institutes of Health, Bethesda,  
Maryland 20892, United States

Corresponding authors: P. Huang ([peng.huang@nih.gov](mailto:peng.huang@nih.gov)); X. Chen ([shawn.chen@nih.gov](mailto:shawn.chen@nih.gov)); Z.  
Nie ([znie@umd.edu](mailto:znie@umd.edu))

<sup>§</sup>The authors equally contributed to this article.

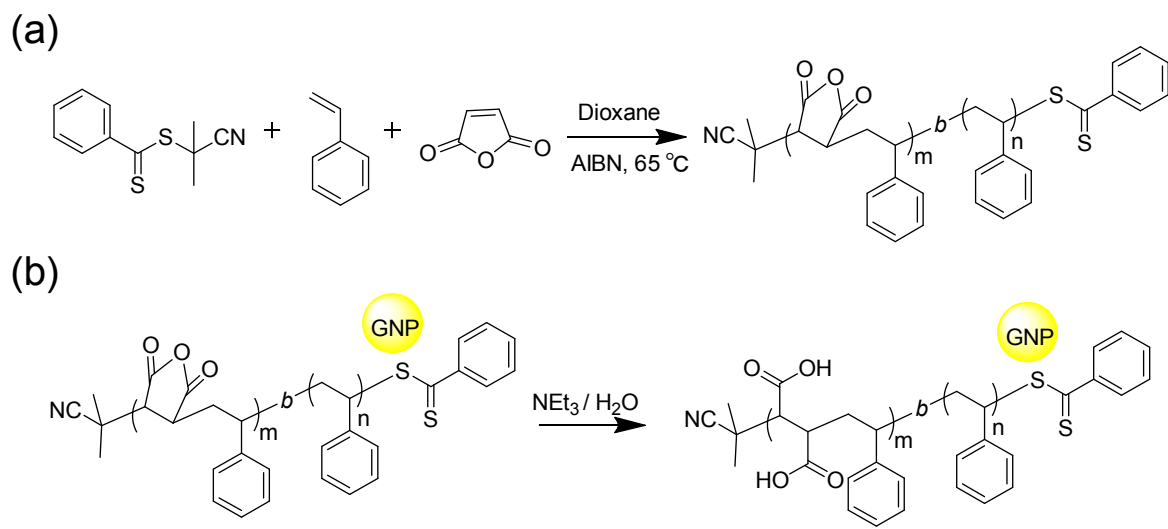

**Figure S1.** (a) The synthetic route of amphiphilic block copolymer (BCP) poly(styrene-*alt*-maleic anhydride)-*b*-polystyrene (PSMA-*b*-PS). (b) The hydrolysis of the PSMA-*b*-PS on the surface of GNPs.

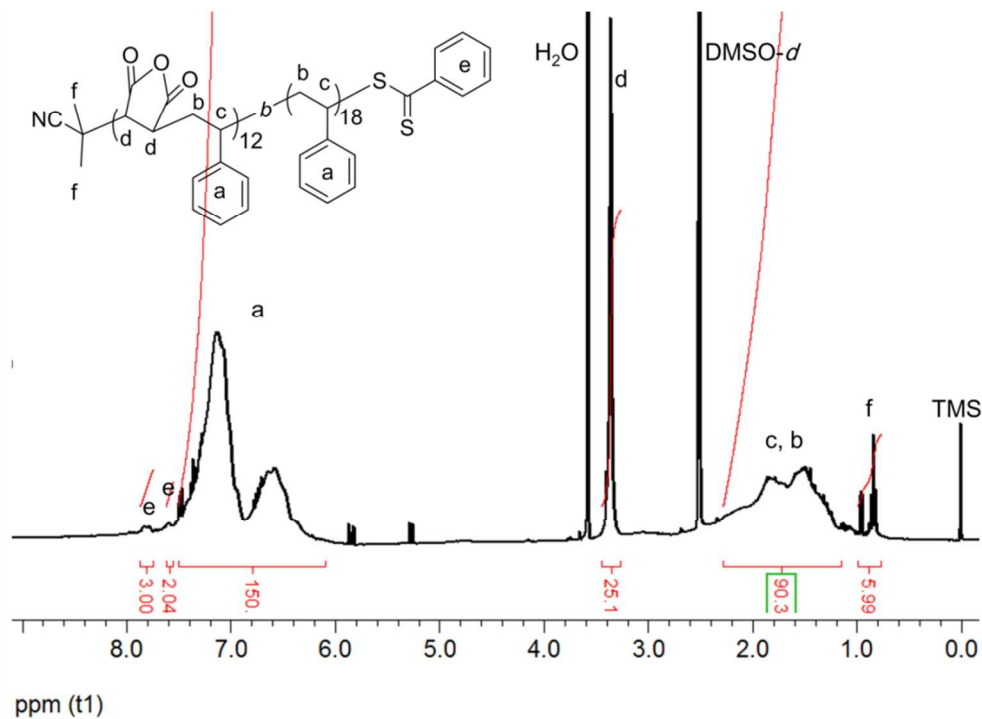

**Figure S2.**  $^1\text{H}$  NMR spectrum of poly(styrene-*alt*-maleic anhydride)-*b*-polystyrene (PSMA-*b*-PS).

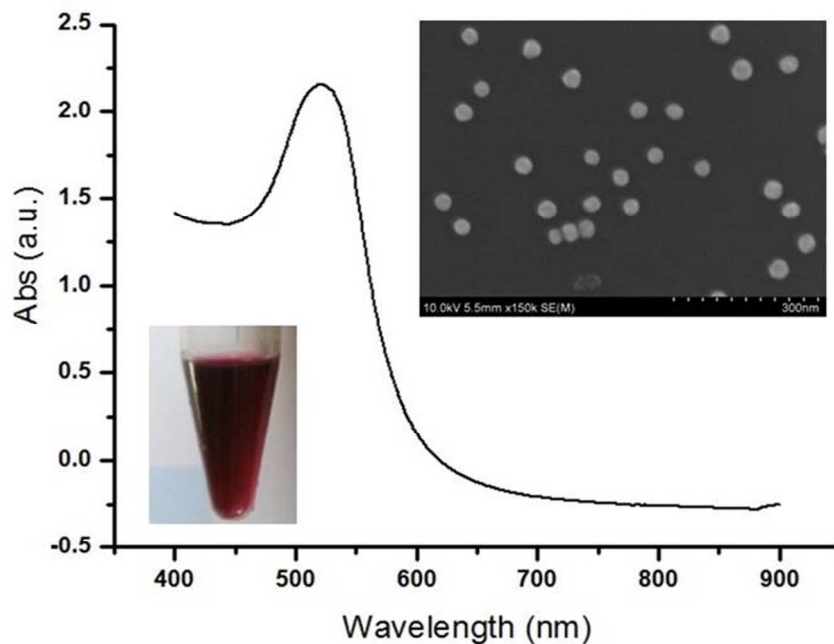

**Figure S3.** Characterization of PSMA-*b*-PS functionalized spherical GNPs. SEM image, UV-vis spectrum, and photograph.

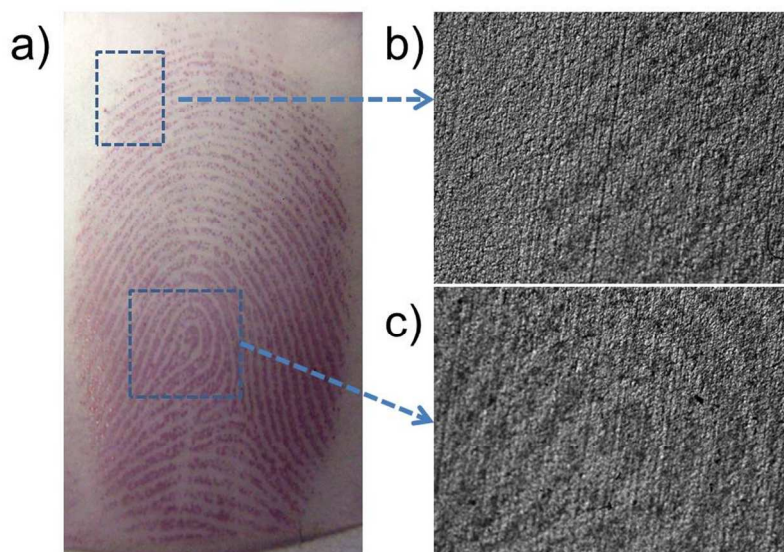

**Figure S4.** Colorimetric image of LFP using amphiphilic BCP PSMA-*b*-PS functionalized GNPs.

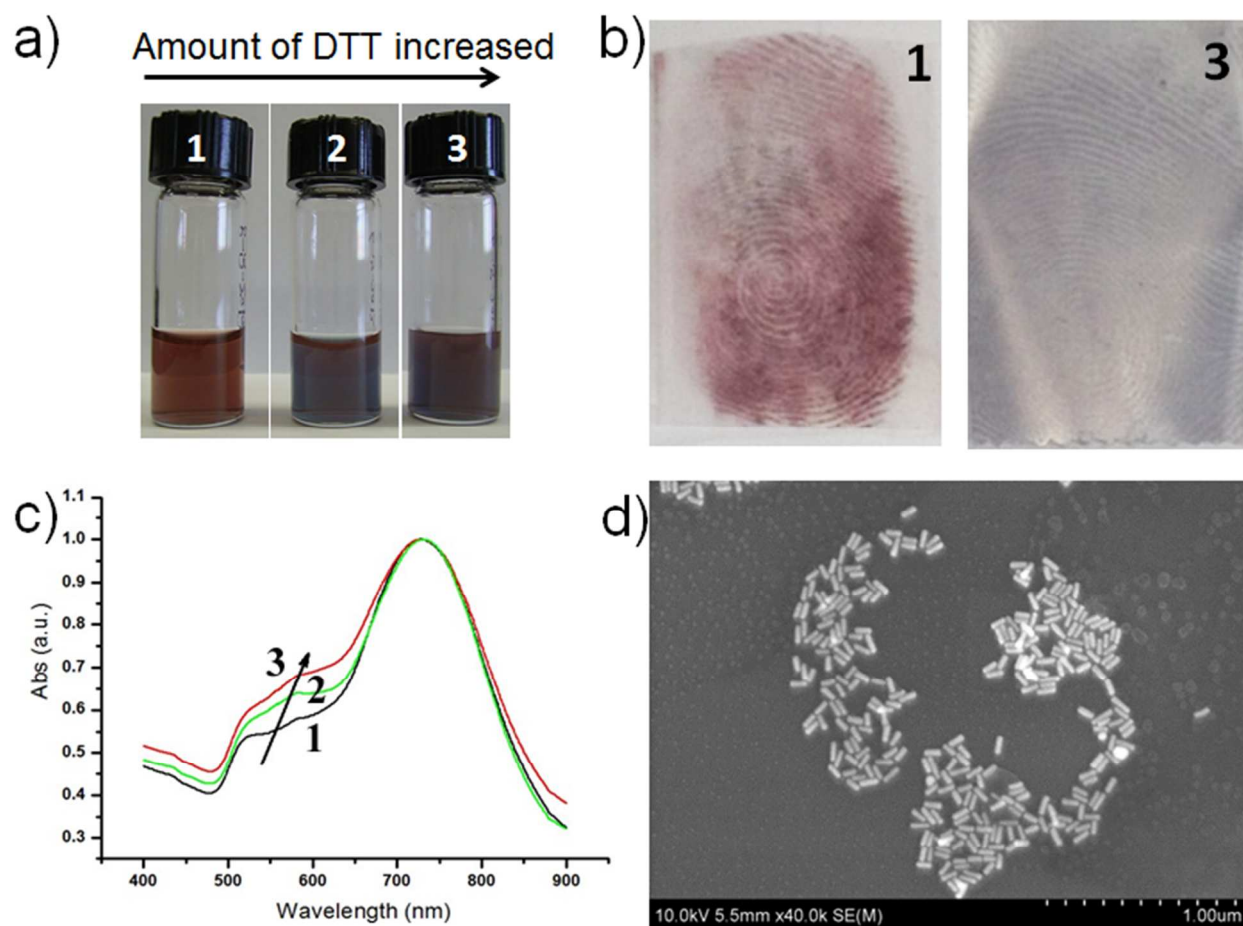

**Figure S5.** Self-assembly-dependent colorimetric imaging of LFPs using BCP PSMA-*b*-PS functionalized gold nanorods (GNRs). (a) Photograph of 1-Dodecanethiol-induced self-assembly-dependent color change of as-prepared GNRs aqueous solutions (From **1** to **3**: 1, 2, and 4  $\mu$ L, respectively). (b) Colorimetric images of LFPs using the corresponding **1** and **3** GNPs solutions. (c) UV-vis spectra of as-prepared GNRs aqueous solutions at different self-assembly levels. (d) The corresponding SEM images of **3**.

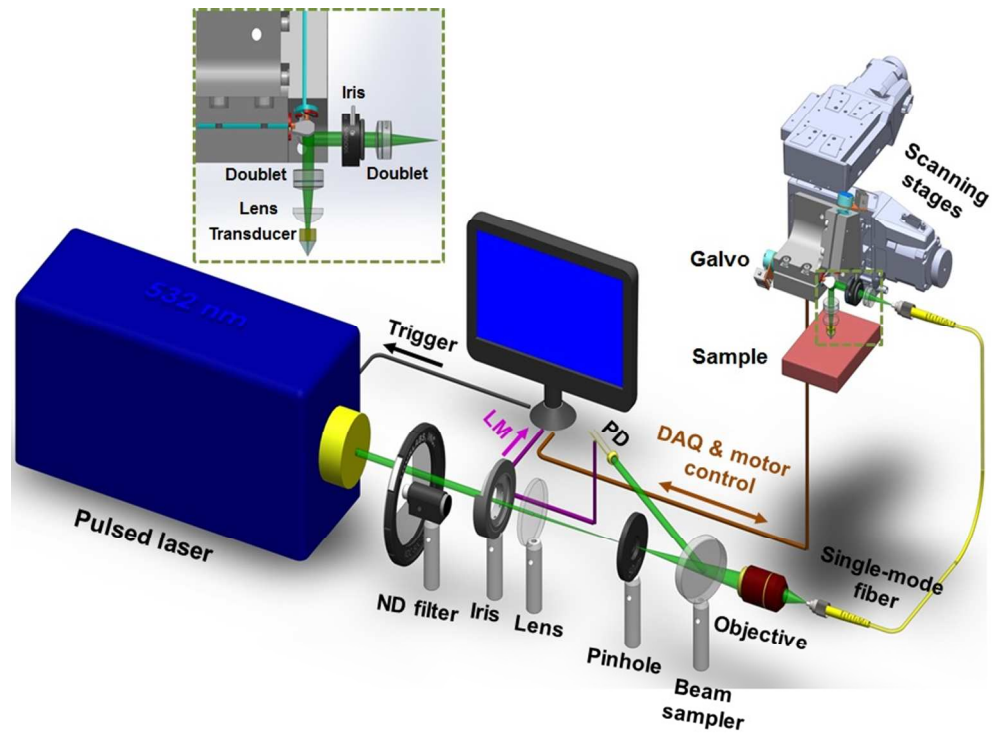

**Figure S6.** System schematic of the photoacoustic microscope platform with the blow-up of the scan head boxed. DAQ, data acquisition. LM, laser monitoring. PD, photodiode. ND, neutral density.
